# Supplementary material for: Alpha-tocopherylquinone-mediated activation of the Aryl Hydrocarbon Receptor regulates the production of inflammation-inducing cytokines and ameliorates intestinal inflammation
Source: PubMed Central journal article supplement — Mucosal Immunol. Author manuscript; Available in PMC 2024 Jan 25. (PMC10809159; doi:10.1016/j.mucimm.2023.09.003), 2023-09-15
Supplement: NIHMS1955344-supplement-1.pdf [file NIHMS1955344-supplement-1.pdf]

Supplementary Figure S1

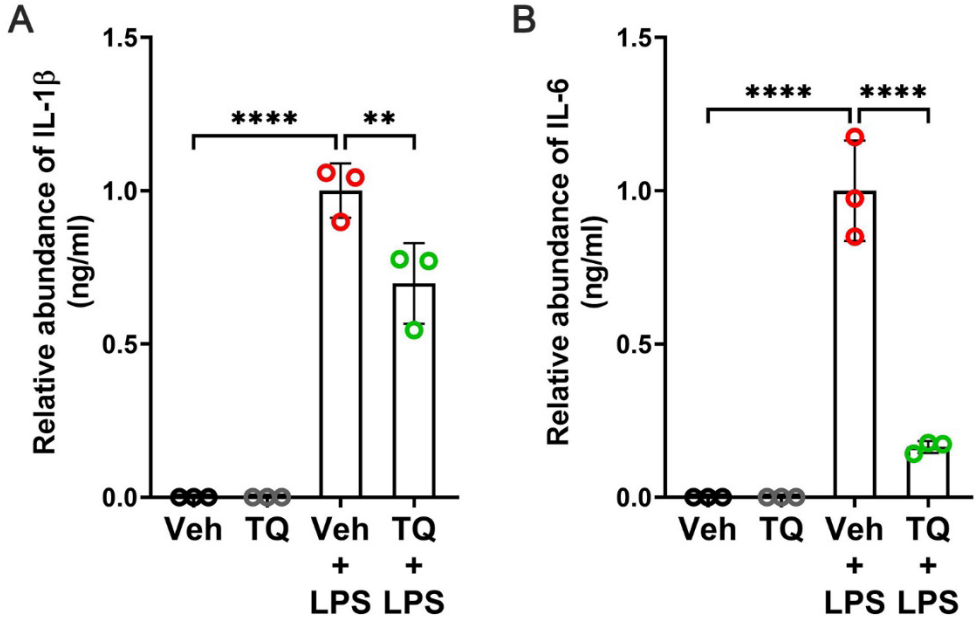

Supplementary Figure S1.

In U937 cells, the addition of TQ (25  $\mu$ M) along with LPS reduced the levels of IL-1 $\beta$  (**S1A**) and IL-6 (**S1B**) in the cell culture supernatants as assessed by ELISA. Data represented as mean  $\pm$  SEM, n =3 independent experiments. One-Way ANOVA with Tukey's post-test. \*\* p < 0.01, \*\*\*\* p<0.0001.

## Supplementary Figure S2

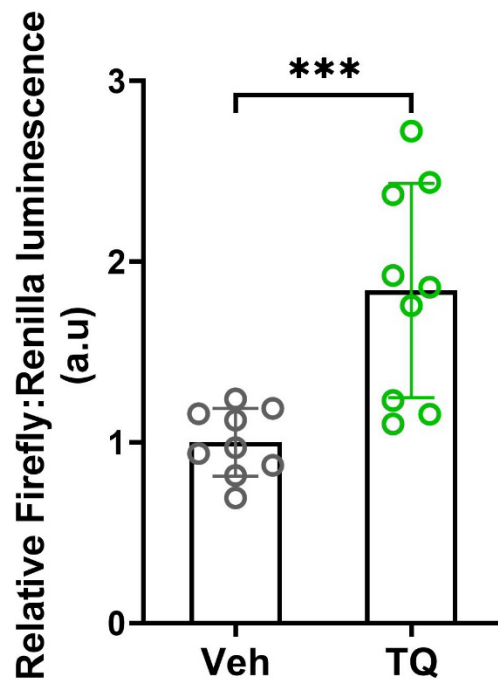

## Supplementary Figure S2.

U937 cells transfected with an XRE-Luciferase reporter plasmid showed increased luciferase activity upon TQ treatment demonstrating that TQ activates AhR. Data represented as mean  $\pm$  SEM, n = 3 independent experiments with 3 technical replicates/experiment. Student's t-test. \*\*\* p<0.001.

**Supplementary Figure S3**

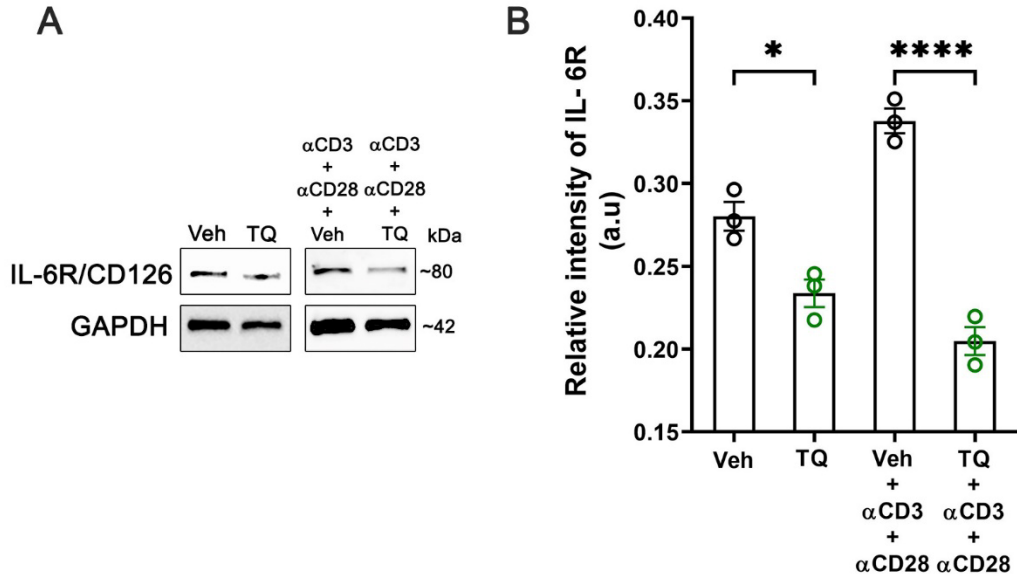

**Supplementary Figure S3.**

**(A)** Administration of TQ to FAC Sorted primary murine CD4<sup>+</sup> T cells reduced the protein levels of CD126/IL-6R in the presence or absence of the activating anti-CD3 and anti-CD28 antibodies. Image representative of 3 independent blots.

**(B)** Densitometric quantification of IL-6R bands normalized to GAPDH from panel A.

Data represented as mean ± SEM, n = 3 mice. One-Way ANOVA with Tukey's post-test. \* p < 0.05, \*\*\*\* p<0.0001.

Supplementary Figure S4

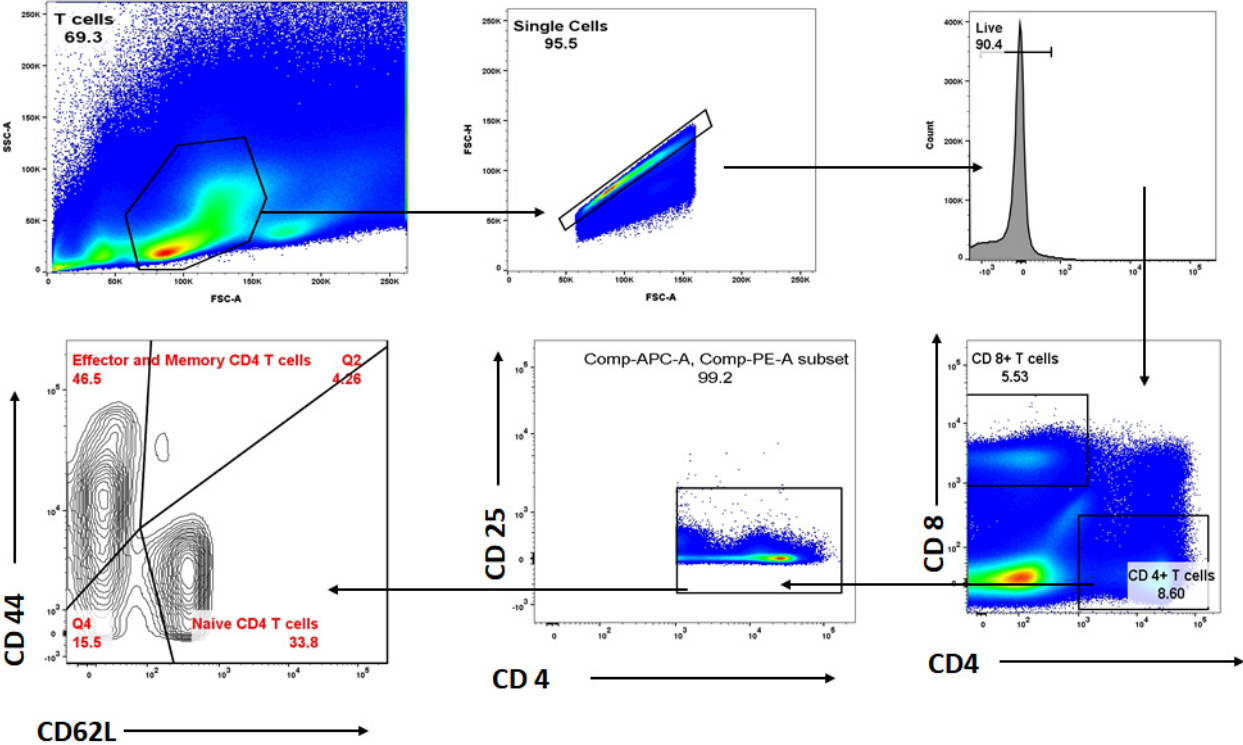

Supplementary Figure S4.

Representation of the cell sorting strategy utilized to isolate naive CD4<sup>+</sup> T-cells from WT and *Ahr*<sup>-/-</sup> mice.

Supplementary Figure S5

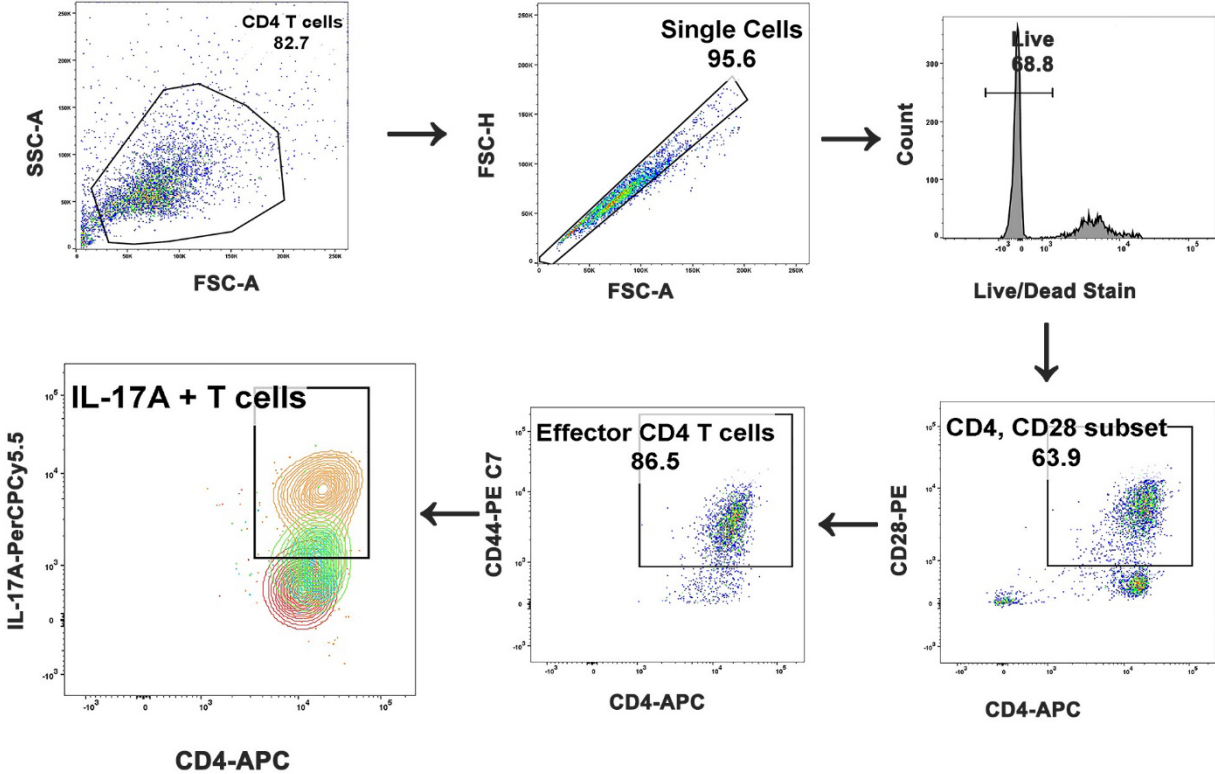

Supplementary Figure S5.

Individual flow plots for identification and quantification of the Th17 cells differentiated from naïve CD4<sup>+</sup> T cells isolated from WT mice.

Supplementary Figure S6

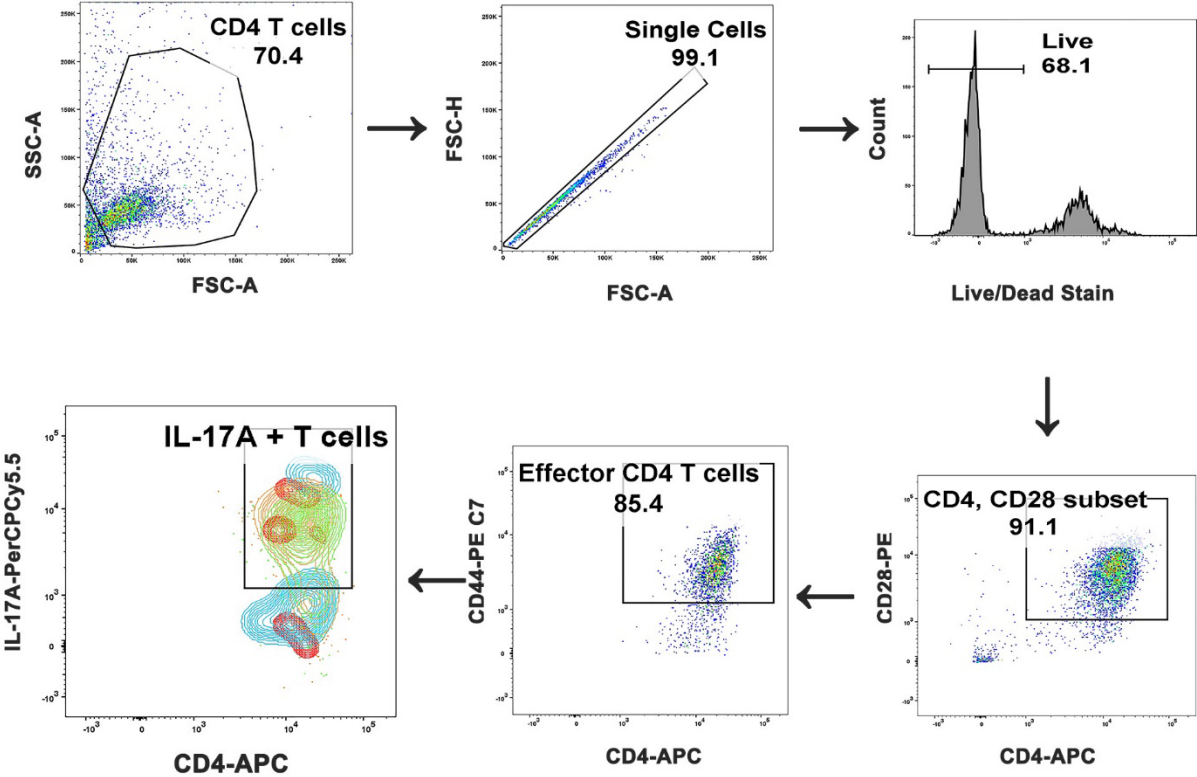

Supplementary Figure S6.

Individual flow plots for identification and quantification of the Th17 cells differentiated from naïve CD4<sup>+</sup> T cells isolated from *Ahr*<sup>-/-</sup> mice.

## Supplementary Figure S7

**A**

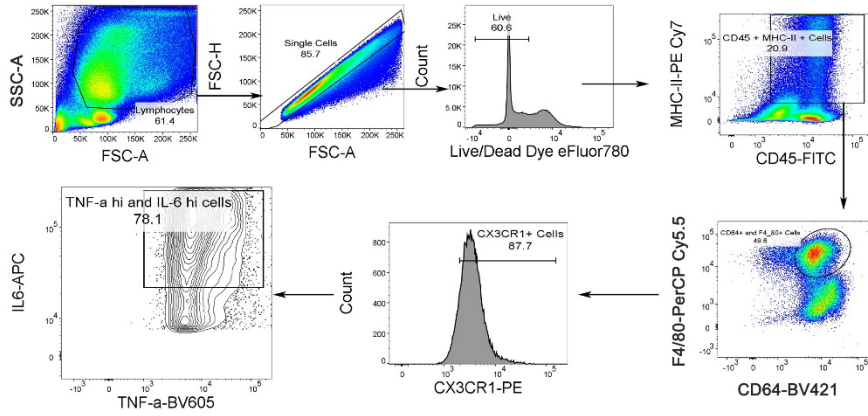

**B**

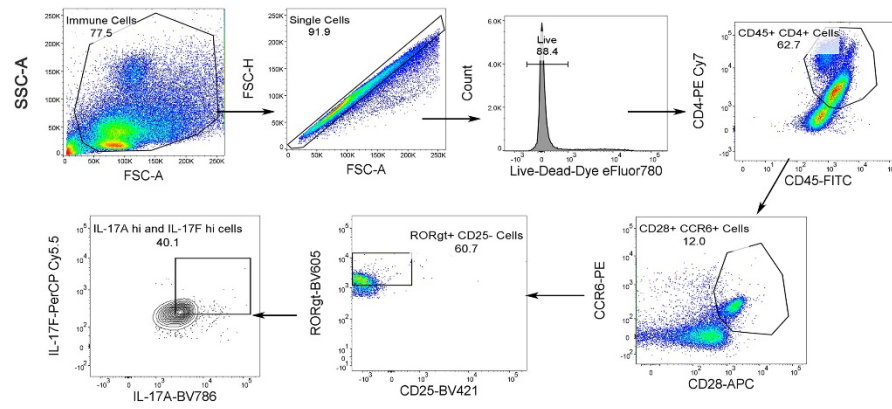

**C**

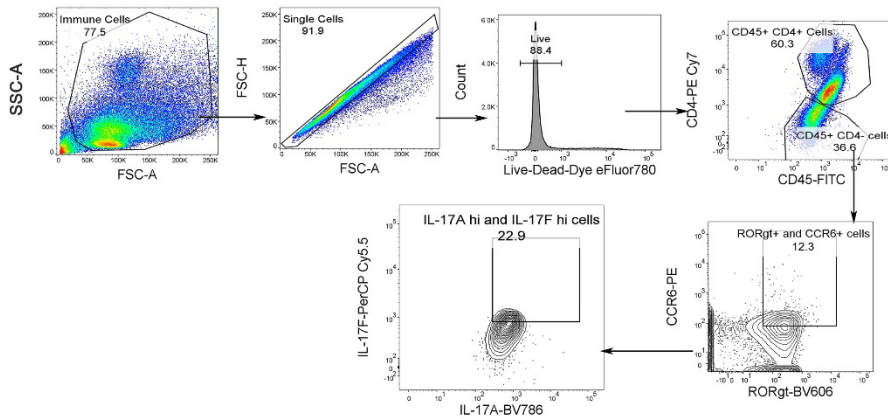

**Supplementary Fig. S7.** Gating strategy used to identify murine inflammatory macrophages (A), Th17 cells (B), and ILC3 (C) cells.
